# Supplementary material
Source: PubMed Central journal article supplement (PMC5647591)
Supplement: mmc1.pdf [file mmc1.pdf]

**Biophysical Journal, Volume 113**

**Supplemental Information**

**Enzyme-Triggered Dissociation of a FRET-Based Protein Biosensor  
Monitored by Synchrotron SAXS**

**Greta Faccio and Stefan Salentinig**

# Supporting Information

## Enzyme-triggered dissociation of a FRET-based protein biosensor monitored by synchrotron SAXS

*Greta Faccio\**, *Stefan Salentinig\**

Laboratory for Biointerfaces, Department Materials meet Life, Empa, Swiss Federal  
Laboratories for Materials Science and Technology, Lerchenfeldstrasse 5, 9014 St. Gallen,  
Switzerland

\*Corresponding authors:

G.F. [greta.faccio@gmail.com](mailto:greta.faccio@gmail.com)

S.S. [stefan.salentinig@gmail.com](mailto:stefan.salentinig@gmail.com) and [stefan.salentinig@empa.ch](mailto:stefan.salentinig@empa.ch)

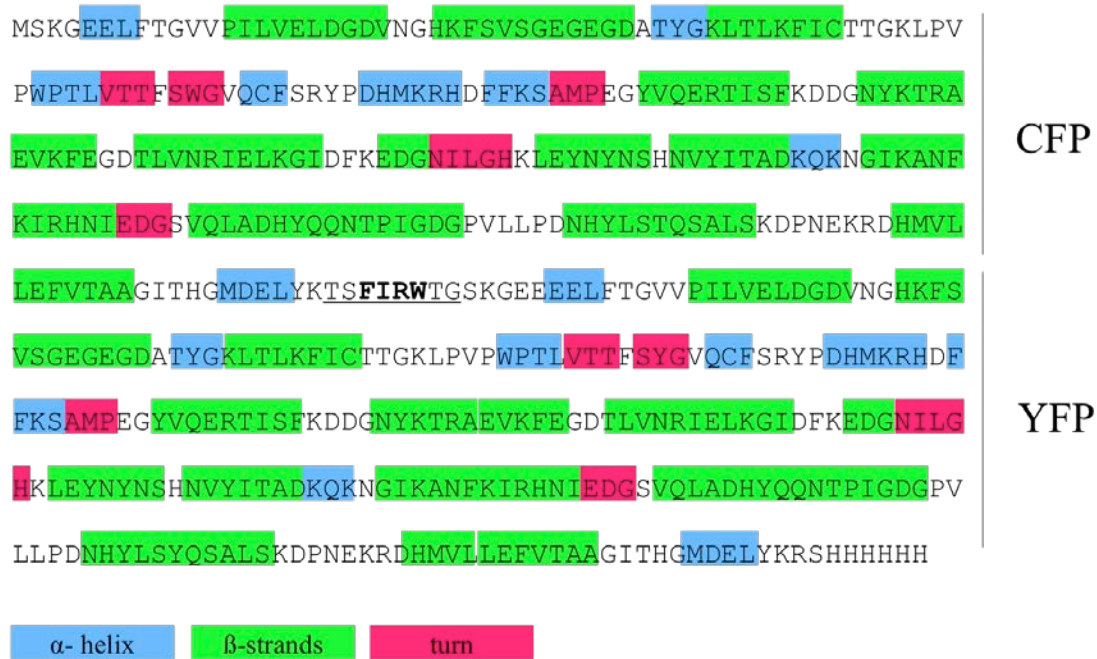

**Figure S1.** Primary structure of the biosensors with reported secondary structure elements. Secondary structure elements were identified by sequence homology with the green fluorescent protein GFP (Uniprot ID: P42212). The sequence of the linker region connecting the CFP and the YFP moieties is underlined and the NE-recognition site is in bold.

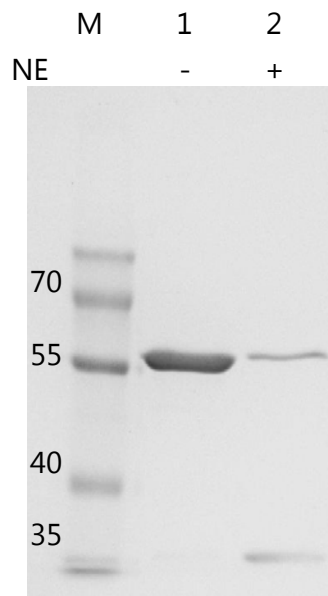

**Figure S2.** SDS PAGE analysis of the biosensors incubated in the presence (+) or absence (-) of the protease neutrophil elastase. Molecular weight markers are reported in kDa in the first lane.
